# Supplementary material for: Low-operating temperature ammonia sensor based on Cu2O nanoparticles decorated with p-type MoS2nanosheets
Source: Royal Society of Chemistry journal article supplement (doi:10.1039/d1tc00391g), 2021-01-01
Supplement: d1tc00391g1.pdf [file d1tc00391g1.pdf]

## Supporting Information

### **Low-operating temperature ammonia sensor based on Cu<sub>2</sub>O nanoparticles decorated with p-type MoS<sub>2</sub> nanosheets**

Yanqiao Ding<sup>a</sup>, Xuezheng Guo<sup>a</sup>, Bingsheng Du<sup>a</sup>, Xiaofei Hu<sup>a</sup>, Xi, Yang<sup>b</sup>, Yong He<sup>\*a</sup>, Yong Zhou<sup>\*a</sup> and Zhigang Zang<sup>\*a</sup>

<sup>a</sup> Key Laboratory of Optoelectronic Technology and Systems (Ministry of Education), Chongqing 400044, China

<sup>b</sup> Institute of Chemical materials, China Academy of Engineering Physics, Mianyang 621900, China

\* Corresponding author: Prof. Zhigang Zang, E-mail: [zangzg@cqu.edu.cn](mailto:zangzg@cqu.edu.cn); Prof. Yong He, E-mail: [yonghe@cqu.edu.cn](mailto:yonghe@cqu.edu.cn); Prof. Yong Zhou, E-mail: [zhyf@cqu.edu.cn](mailto:zhyf@cqu.edu.cn)

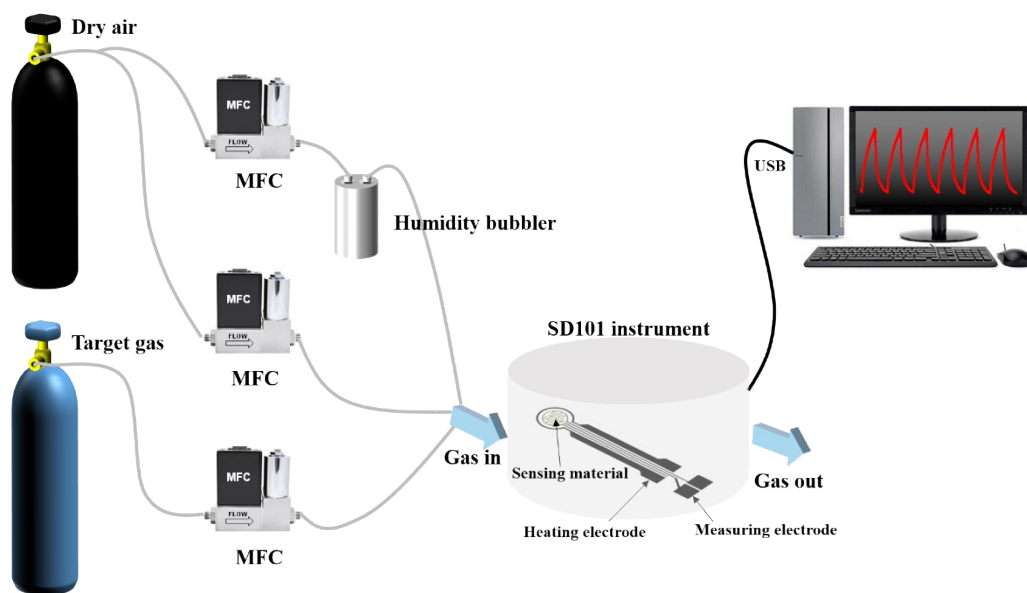

**Figure S1** The schematic of gas sensor device and measuring system.

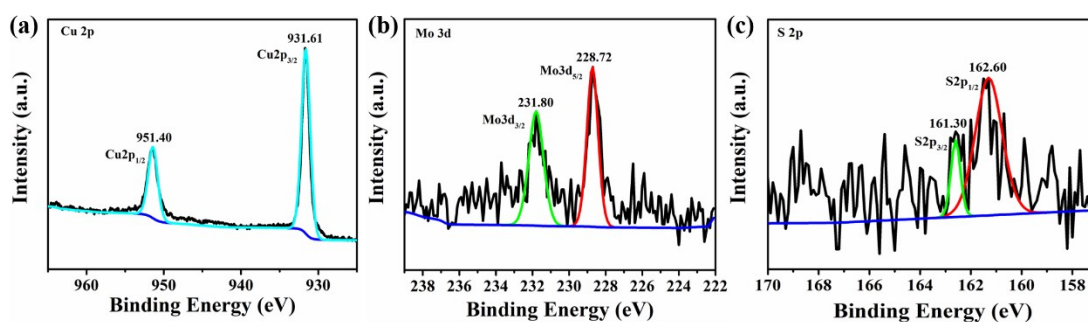

**Figure S2** XPS spectra of Cu 2p (a), Mo 3d (b) and S 2p (c) in M-5 nanohybrid.

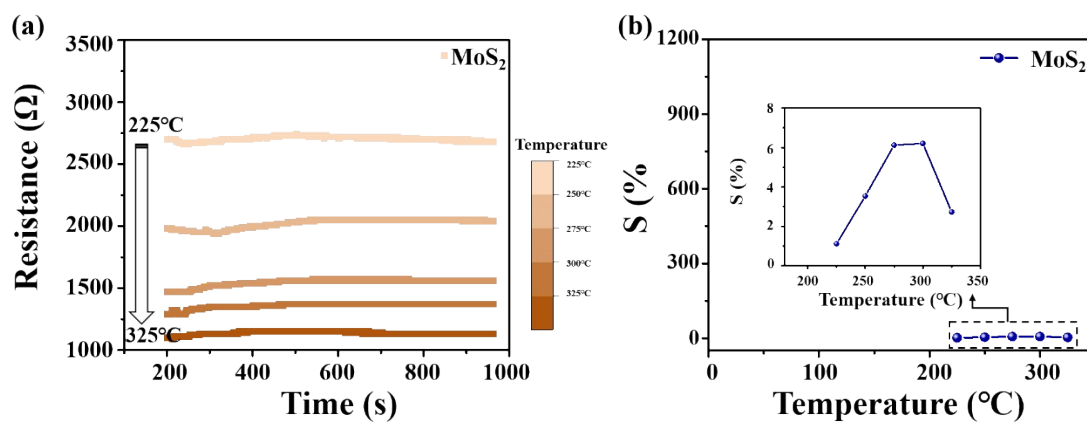

**Figure S3** Transient resistance and sensing response of pure MoS<sub>2</sub> to 100 ppm NH<sub>3</sub> at different operating temperatures.

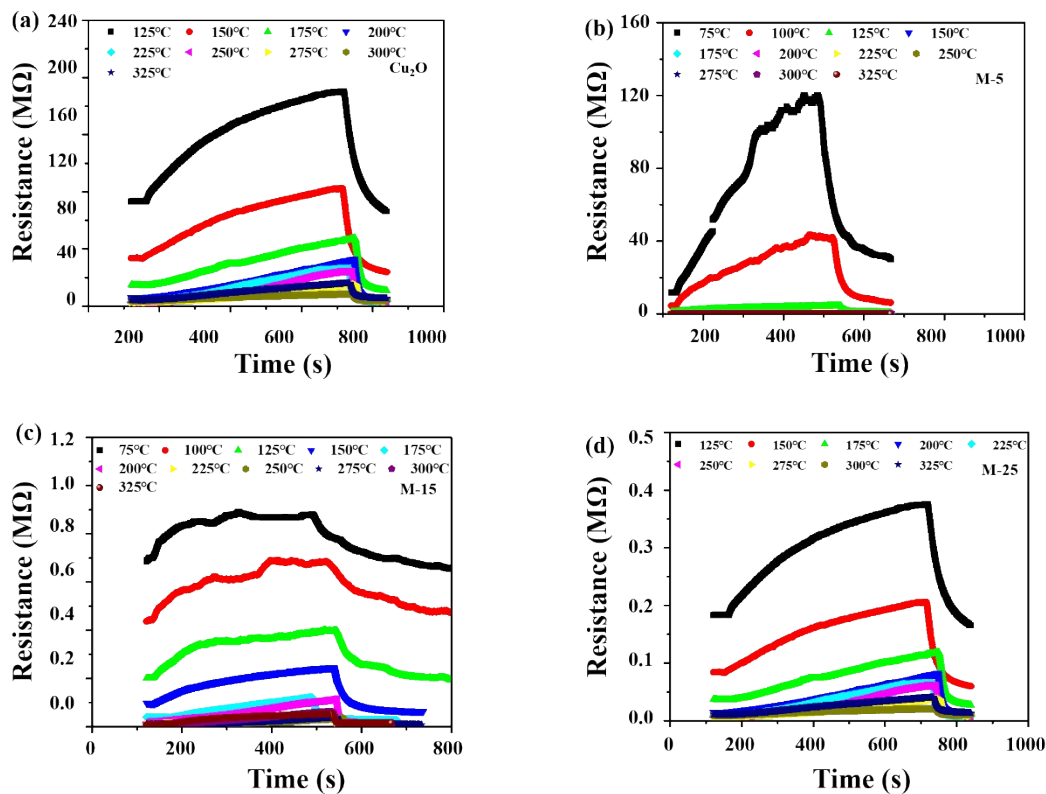

**Figure S4** Transient resistance in the dotted box to 100 ppm NH<sub>3</sub> at different operating temperatures

(a) Cu<sub>2</sub>O; (b) M-5 nanohybrid; (c) M-15 nanohybrid; (d) M-25 nanohybrid.

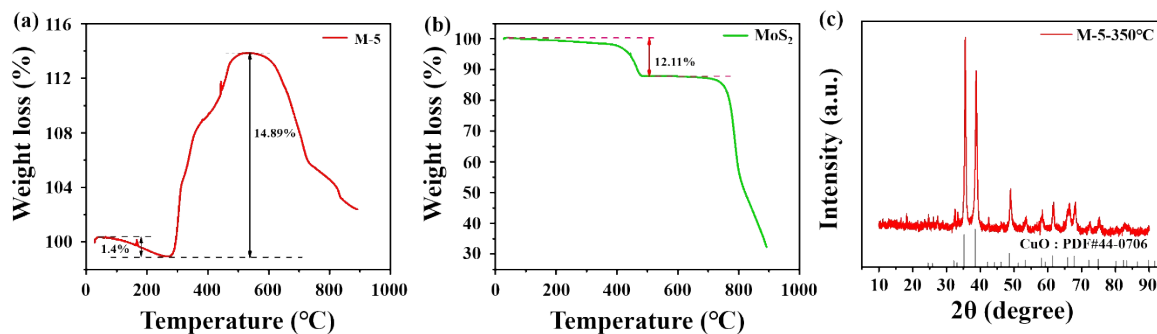

**Figure S5** TGA analysis under air atmosphere with a heating rate of 10 °C/min (a) M-5; (b) MoS<sub>2</sub>;

(c) The XRD pattern of M-5 calcined at 350°C under air atmosphere for 30 min.

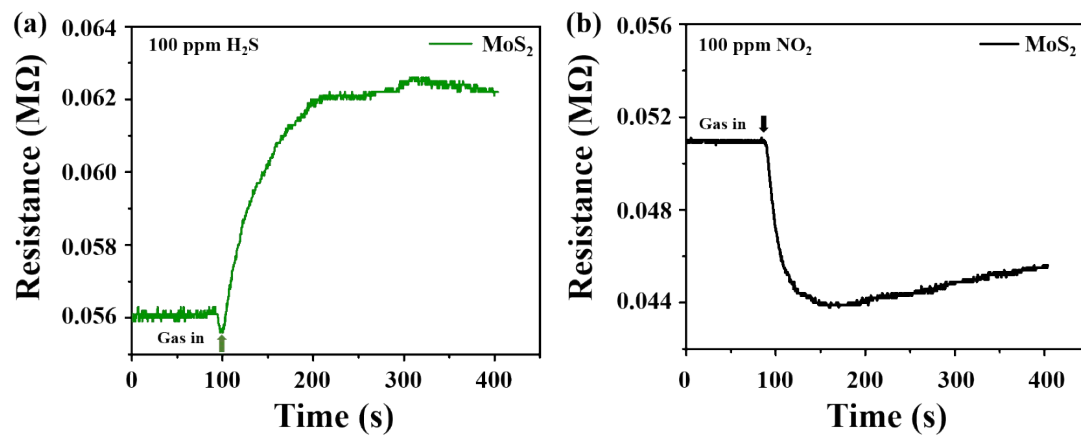

**Figure S6** Response towards 100 ppm gas at 25°C (a) H<sub>2</sub>S; (b) NO<sub>2</sub>.
